# Supplementary material
Source: PubMed Central journal article supplement (PMC2846716)
Supplement: NIHMS175874-supplement-1_si_001.pdf [file NIHMS175874-supplement-1_si_001.pdf]

Supporting information

**Engineering Galanin Analogues that Discriminate Between GalR1 and GalR2  
Receptor Subtypes and Exhibit Anticonvulsant Activity Following Systemic  
Delivery**

Charles R. Robertson, Erika Adkins Scholl, Timothy H. Pruess, Brad R. Green, H. Steve  
White, Grzegorz Bulaj

**Table of Contents:**

**Supplementary Table S1:** Peptide sequences and their MALDI-TOF masses.

**Supplementary Table S2:** Physicochemistry properties of peptides analogues.

**Supplementray Figure S1:** Representative HPLC chromatogram of [N-Ac, des-Sar]Gal-B2.

**Supplementary Table S1.** Peptide sequences and their MALDI-TOF masses. Lys-P is palmitoylation of N<sup>ε</sup> of lysine.

| Analogue                     | Structure                                         | Mass Spec. Exp. | Mass Spec. Calc. |
|------------------------------|---------------------------------------------------|-----------------|------------------|
| <b>Gal-B2</b>                | ( <b>Sar</b> ) WTLNSAGYLLGP <b>PK(Lys-P)K</b>     | 2112.33         | 2112.60          |
| <b>[Sar1Ala]Gal-B2</b>       | <b>A</b> WTLNSAGYLLGP <b>PK(Lys-P)K</b>           | 2112.57         | 2112.13          |
| <b>[Sar1Gly]Gal-B2</b>       | <b>G</b> WTLNSAGYLLGP <b>PK(Lys-P)K</b>           | 2099.18         | 2099.60          |
| <b>[N-Ac, des-Sar]Gal-B2</b> | ( <b>N-Ac-Trp</b> ) TLNSAGYLLGP <b>PK(Lys-P)K</b> | 2083.15         | 2083.60          |
| <b>[N-Me, des-Sar]Gal-B2</b> | ( <b>N-Me-Trp</b> ) TLNSAGYLLGP <b>PK(Lys-P)K</b> | 2056.55         | 2056.57          |
| <b>Gal-B5</b>                | WTLNSAGYLLGP <b>PK(Lys-P)K</b>                    | 2040.13         | 2040.46          |

**Supplementary Table S2.** Physicochemistry properties of peptides analogues. Log D values were calculated from HPLC retention times (\*\*previously presented Bulaj et al. *J. Med. Chem.* **2008**, *51*, 8038-8047). Rat serum stability was determined by incubating peptides in 25% rat serum at 37 °C. Purity was determined on 5 µg injections of peptide on a linear gradient 20% to 100% Buffer B in 40 mins.

| Analogue                     | HPLC retention time (min) | Calc log D  | % Purity |
|------------------------------|---------------------------|-------------|----------|
| <b>Gal-B2</b>                | **                        | 1.24 ± 0.02 | 98.8%    |
| <b>[Sar1Ala]Gal-B2</b>       | 17.54 ± 0.03              | 1.28 ± 0.01 | 95.5%    |
| <b>[Sar1Gly]Gal-B2</b>       | 17.72 ± 0.31              | 1.30 ± 0.04 | 96.9%    |
| <b>[N-Ac, des-Sar]Gal-B2</b> | 17.50 ± 0.05              | 1.28 ± 0.02 | 97.3%    |
| <b>[N-Me, des-Sar]Gal-B2</b> | 17.65 ± 0.08              | 1.29 ± 0.01 | 96.7%    |
| <b>Gal-B5</b>                | **                        | 1.22 ± 0.02 | 99.5%    |

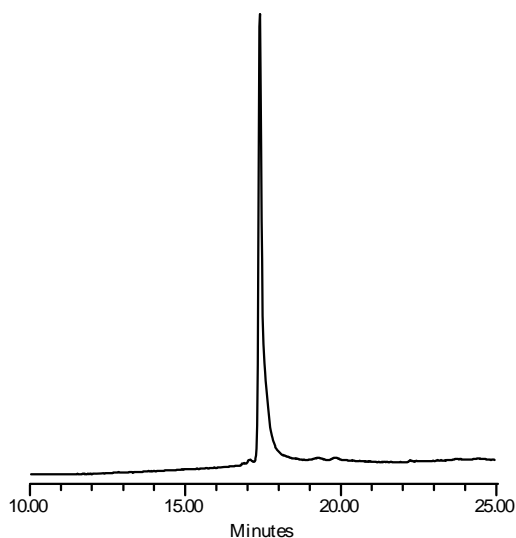

**Supplementary Figure S1.** Representative HPLC chromatogram of analogue **[N-Me, des-Sar]Gal-B2** on a linear gradient 20% to 100% Buffer B in 40 mins, 96.7% purity.
